# Supplementary material for: Bridging the Gap: Linking Molecular Simulations and Systemic Descriptions of Cellular Compartments
Source: PubMed Central journal article supplement (PMC2989909; doi:10.1371/journal.pone.0014070), 2010-11-22
Supplement: pone.0014070.s001.pdf [file pone.0014070.s001.pdf]

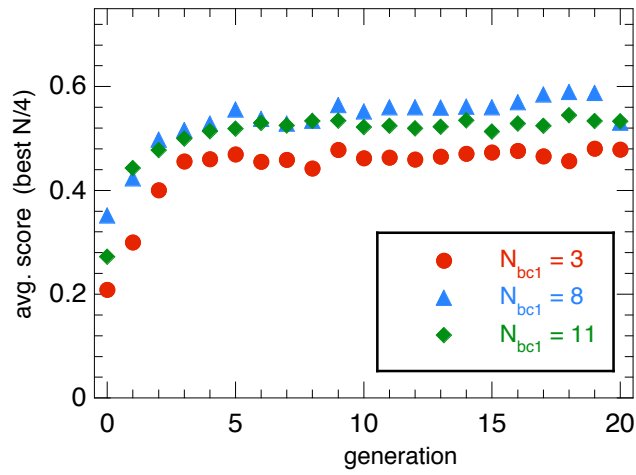

**Figure S1: Determining the Number of bc1 Complexes: Evolution of the Master Score**

Convergence of the average master scores of the best 100 parameter sets during three optimization runs with different numbers of  $bc_1$  complexes  $N_{bc1}$ . These optimizations used  $N = 40$  individuals per generation.
