# Supplementary material for: Bridging the Gap: Linking Molecular Simulations and Systemic Descriptions of Cellular Compartments
Source: PubMed Central journal article supplement (PMC2989909; doi:10.1371/journal.pone.0014070), 2010-11-22
Supplement: pone.0014070.s002.pdf [file pone.0014070.s002.pdf]

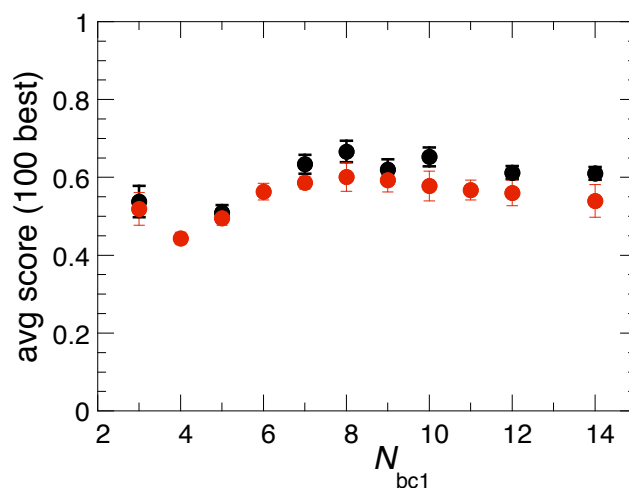

**Figure S2: Determining the Number of  $bc_1$  Complexes: Average Master Score**

Average master score of the best 100 (out of a total of 840) parameter sets vs. the number of  $bc_1$  complexes  $N_{bc1}$  for the single flash experiment used to determine  $N_{bc1}$ . This value of  $N_{bc1}$  was later employed for the optimization of the rate constants. The black points show the result from the first set of optimizations that considered  $\Delta\Phi::\epsilon_M$ ,  $\Delta\Phi::\Delta\Phi_0$ , and  $bc_1::\Phi_0$ . In the second set (red points), PR::pK was included, too.
