# Supplementary material for: Bridging the Gap: Linking Molecular Simulations and Systemic Descriptions of Cellular Compartments
Source: PubMed Central journal article supplement (PMC2989909; doi:10.1371/journal.pone.0014070), 2010-11-22
Supplement: pone.0014070.s004.pdf [file pone.0014070.s004.pdf]

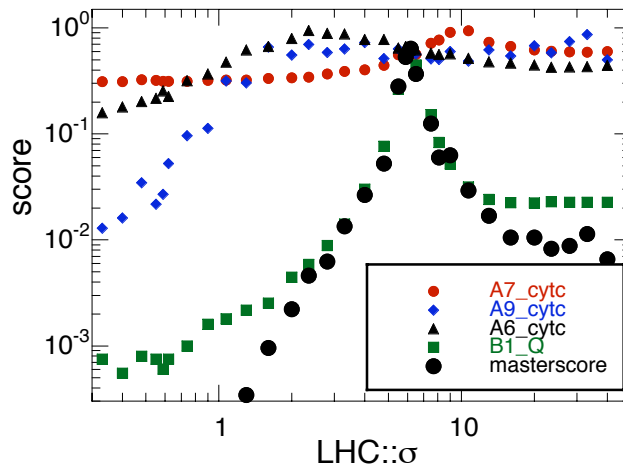

**Figure S4: Scores from Some Experiments During the Scan of One Parameter**

Masterscore and individual scores from four of the experiments obtained from a scan of `LHC::σ` starting from the optimal set of parameters. All scores were rescaled to coincide at the maximum value of the masterscore. The other individual scores, which are not shown, have an even weaker dependence on `LHC::σ`. One can see that the optimal parameter value is determined mainly by the scenario `B1_Q`, whereas `A7_cytc` would favor a larger value and `A6_cytc` and `A9_cytc` would perform better with a smaller value of `LHC::σ`.
