# Supplementary material for: Bridging the Gap: Linking Molecular Simulations and Systemic Descriptions of Cellular Compartments
Source: PubMed Central journal article supplement (PMC2989909; doi:10.1371/journal.pone.0014070), 2010-11-22
Supplement: pone.0014070.s005.pdf [file pone.0014070.s005.pdf]

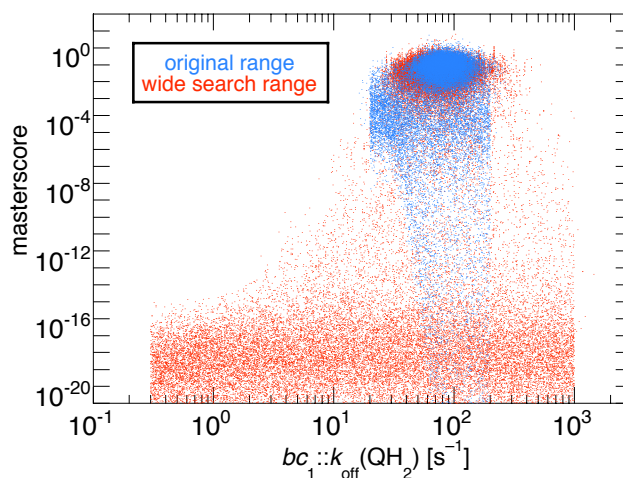

**Figure S5: Comparison of a Score Distribution Obtained from a Main Parameterization Run and from a Wide Range Verification Run**

In the main optimization runs the ranges for the random initialization of the parameter values were chosen based on biochemical or steady state estimates in order to get good statistics for the optimization. The initially estimated ranges were then verified by running additional optimizations with wide ranges for the parameter initialization which then spanned three to six orders of magnitude for each parameter. This figure illustrates on the example of the parameter  $bc_{1::k_{\text{off}}}(\text{QH}_2)$  how the masterscore falls off fast beyond the initially chosen interesting parameter range. From the wide range scan one can see that the parameter should be larger than  $30 \text{ s}^{-1}$  with a—visually estimated—optimal value of about  $70 \text{ s}^{-1}$ . A complete list of search ranges and parameter estimated is given in table S3.
