# Supplementary material for: Bridging the Gap: Linking Molecular Simulations and Systemic Descriptions of Cellular Compartments
Source: PubMed Central journal article supplement (PMC2989909; doi:10.1371/journal.pone.0014070), 2010-11-22
Supplement: pone.0014070.s006.pdf [file pone.0014070.s006.pdf]

| Parameter                                                  | Value                                 | Description                                                 |
|------------------------------------------------------------|---------------------------------------|-------------------------------------------------------------|
| $bc_1::k_{\text{on}}(\text{H}^+_{\text{out}})$             | $10^{10} \text{ nm}^3 \text{ s}^{-1}$ | rate for proton uptake from the cytoplasm by $bc_1$         |
| $bc_1::k_{\text{tr}}(\text{e}:Q_0 \Rightarrow \text{FeS})$ | $2.3 * 10^3 \text{ s}^{-1}$           | rate for electron transfer from $Q_0$ to FeS                |
| $bc_1::k_{\text{tr}}(\text{e}:c_1 \Rightarrow c_2)$        | $10^5 \text{ s}^{-1}$                 | electron transfer rate from $c_1$ to bound cytochrome $c_2$ |
| $bc_1::k_{\text{tr}}(\text{e}:Q_0 \Rightarrow b_L)$        | $10^4 \text{ s}^{-1}$                 | electron transfer from $Q_0$ to $b_L$ heme                  |
| $bc_1::k_{\text{tr}}(\text{e}:b_L \Rightarrow b_H)$        | $10^4 \text{ s}^{-1}$                 | electron transfer from $b_L$ to $b_H$ heme                  |
| $\Delta\Phi::V$                                            | $2.65 * 10^4 \text{ nm}^3$            | inner volume of the vesicle                                 |
| $\Delta\Phi::A$                                            | $5.28 * 10^3 \text{ nm}^2$            | membrane area (Q pool „volume“)                             |
| $\Delta\Phi::C_{\text{Hin}}$                               | 1.0 e                                 | effective charge of a free proton in the vesicle            |
| $\Delta\Phi::C_{\text{Hm}}$                                | 1.0 e                                 | effective charge of a proton on the titratable groups       |
| $\Delta\Phi::C_{\text{prot}}$                              | -1.0 e                                | effective charge of an $e^-$ translocated through an RC     |
| $\Delta\Phi::C_{\text{cred}}$                              | -0.5 e                                | effective charge of a reduced cytochrome $c_2$              |
| $\Delta\Phi::C_{\text{cox}}$                               | 0.5 e                                 | effective charge of an oxidized cytochrome $c_2$            |
| PR:: $N_p$                                                 | 80                                    | number of titratable groups in the vesicle                  |
| PR::pK                                                     | 5.0                                   | pK of the titratable groups                                 |
| $N_{\text{core}}$                                          | 10                                    | number of dimeric core complexes (2 RC + 1 LHC)             |
| $N_{bc_1}$                                                 | 10                                    | number of cytochrome $bc_1$ complexes                       |
| $N_{\text{ATPase}}$                                        | 1                                     | number of ATPases                                           |
| $N_{c_2}$                                                  | 20                                    | total number of cytochrome $c_2$                            |
| $N_Q$                                                      | 200                                   | total number of quinones                                    |

**Table S1: Model Parameters Not Included in the Optimization Process**

Parameters and stoichiometries that were not included in the optimization process with their (fixed) values. Effective charges of  $\pm 0.5$  e were used for the cytochrome  $c_2$  to achieve a change of the total charge of the cytochrome  $c_2$  of  $\pm 1$  e when a reduced  $c_2$  is replaced by an oxidized one or vice versa. Note that  $N_{bc_1}$  was determined prior to the main parameterization and is thus considered a fixed parameter for the chromatophore setup.
