# Supplementary material for: Bridging the Gap: Linking Molecular Simulations and Systemic Descriptions of Cellular Compartments
Source: PubMed Central journal article supplement (PMC2989909; doi:10.1371/journal.pone.0014070), 2010-11-22
Supplement: pone.0014070.s007.pdf [file pone.0014070.s007.pdf]

| Parameter                                                       | A7<br>cytc | A7 $\Delta\Phi$ | A8 $\Delta\Phi$ | A9<br>cytc | B1 Q  | B6 P  | B6<br>cytc | BC1   | avg.  |
|-----------------------------------------------------------------|------------|-----------------|-----------------|------------|-------|-------|------------|-------|-------|
| LHC:: $\sigma$                                                  | 0.426      | 0.633           | 0.426           | 0.606      | 0.934 | 0.746 | 0.746      | –     | 0.645 |
| LHC:: $k_D(E)$                                                  | 0.048      | 0.216           | 0.052           | 0.155      | 0.254 | 0.032 | 0.219      | –     | 0.139 |
| RC:: $k_{on}(E)$                                                | 0.006      | 0.005           | 0.071           | 0.244      | 0.049 | 0.023 | 0.088      | –     | 0.069 |
| RC:: $k_{on}(H^+)$                                              | 0.006      | 0.005           | 0.658           | 0.893      | 0.148 | 0.154 | 0.340      | –     | 0.315 |
| RC:: $k_{on}(Q)$                                                | 0.187      | 0.435           | 0.199           | 0.352      | 0.472 | 0.169 | 0.415      | –     | 0.318 |
| RC:: $k_{off}(QH2)$                                             | 0.207      | 0.488           | 0.169           | 0.518      | 0.556 | 0.275 | 0.493      | –     | 0.387 |
| RC:: $k_{on}(c2red)$                                            | 0.024      | 0.350           | 0.166           | 0.469      | 0.103 | 0.450 | 0.151      | –     | 0.245 |
| RC:: $k_{off}(c2ox)$                                            | 0.216      | 0.485           | 0.182           | 0.337      | 0.440 | 0.149 | 0.488      | –     | 0.328 |
| <i>bc1::k<sub>on</sub>(QH2@Q<sub>o</sub>)</i>                   | 0.064      | 0.019           | 0.211           | 0.385      | –     | 0.123 | 0.303      | 0.406 | 0.216 |
| <i>bc1::k<sub>off</sub>(Q@Q<sub>o</sub>)</i>                    | 0.704      | 0.680           | 0.320           | 0.526      | –     | 0.282 | 0.763      | 0.680 | 0.565 |
| <i>bc1::k<sub>tr</sub>(Q:Q<sub>o</sub>=&gt;Q<sub>i</sub>)</i>   | 0.200      | 0.426           | 0.213           | 0.373      | –     | 0.171 | 0.398      | 0.422 | 0.315 |
| <i>bc1::k<sub>on</sub>(Q@Q<sub>i</sub>)</i>                     | 0.040      | 0.037           | 0.201           | 0.413      | –     | 0.123 | 0.204      | 0.392 | 0.201 |
| <i>bc1::k<sub>off</sub>(QH2@Q<sub>i</sub>)</i>                  | 0.303      | 0.510           | 0.301           | 0.442      | –     | 0.273 | 0.493      | 0.474 | 0.399 |
| <i>bc1::k<sub>tr</sub>(QH2:Q<sub>i</sub>=&gt;Q<sub>o</sub>)</i> | 0.191      | 0.388           | 0.195           | 0.330      | –     | 0.145 | 0.394      | 0.380 | 0.289 |
| <i>bc1::k<sub>on</sub>(c2ox)</i>                                | 0.156      | 0.339           | 0.134           | 0.270      | –     | 0.106 | 0.394      | 0.310 | 0.244 |
| <i>bc1::k<sub>off</sub>(c2red)</i>                              | 0.022      | 0.020           | 0.119           | 0.233      | –     | 0.067 | 0.102      | 0.198 | 0.109 |
| <i>bc1::k<sub>off</sub>(H<sup>+</sup>@Q<sub>o</sub>)</i>        | 0.034      | 0.028           | 0.158           | 0.265      | –     | 0.096 | 0.172      | 0.253 | 0.144 |
| <i>bc1::k<sub>tr</sub>(FeS:b=&gt;c)</i>                         | 0.358      | 0.543           | 0.326           | 0.474      | –     | 0.273 | 0.552      | 0.510 | 0.434 |
| <i>bc1::k<sub>tr</sub>(FeS:c=&gt;b)</i>                         | 0.312      | 0.521           | 0.315           | 0.472      | –     | 0.287 | 0.474      | 0.532 | 0.416 |
| <i>bc1::k<sub>tr</sub>(e:b<sub>H</sub>=&gt;Q<sub>i</sub>)</i>   | 0.144      | 0.361           | 0.145           | 0.300      | –     | 0.126 | 0.286      | 0.346 | 0.244 |
| <i>bc1::<math>\Phi_0</math></i>                                 | 0.457      | 0.522           | 0.506           | 0.664      | –     | 0.498 | 0.556      | 0.608 | 0.544 |
| $\Delta\Phi::\Delta U_0$                                        | 0.325      | 0.525           | 0.405           | 0.520      | 0.576 | 0.359 | 0.524      | –     | 0.462 |
| $\Delta\Phi::\Delta\Phi_0$                                      | 0.001      | 0.126           | 0.352           | 0.490      | 0.301 | 0.263 | 0.338      | –     | 0.267 |
| importance score                                                | 4.431      | 7.662           | 5.824           | 9.731      | 3.833 | 5.190 | 8.893      | 5.511 | 7.296 |

**Table S2: Sensitivities of the Experimental Scenarios**

This table lists the sensitivities  $P_{\min}/P_{\max}$  determined separately for each of the experiments from the respective individual scores. The values in the last column (labelled „avg.“), which are the averages of the individual sensitivities for each of the parameters, are mostly two to four times smaller than the respective sensitivities determined from the masterscore, which make use of all scenarios simultaneously (see table I). The last line lists the importance scores defined as the sum of the sensitivities for each of the experiments. A larger value denotes that this experiment is more important for determining the parameter values.
