# Supplementary material for: Bridging the Gap: Linking Molecular Simulations and Systemic Descriptions of Cellular Compartments
Source: PubMed Central journal article supplement (PMC2989909; doi:10.1371/journal.pone.0014070), 2010-11-22
Supplement: pone.0014070.s008.pdf [file pone.0014070.s008.pdf]

| Parameter [units]                                                                               | Search Range in Run A1              | Search Range in Run A2    | Search Range in Run B6            | Estimated Parameter Range from B6 |
|-------------------------------------------------------------------------------------------------|-------------------------------------|---------------------------|-----------------------------------|-----------------------------------|
| LHC:: $\sigma$ [ $\text{m}^2 \text{W}^{-1} \text{s}^{-1}$ ]                                     | 3 ... 20                            | —                         | 0.1 ... 100                       | 5 ... 32                          |
| LHC:: $N_0$ [1]                                                                                 | —                                   | 0.1 ... 10                | —                                 | —                                 |
| LHC:: $k_D(E)$ [ $\text{s}^{-1}$ ]                                                              | $10^2 \dots 10^5$                   | —                         | $1.0 \dots 3 \cdot 10^4$          | $\geq 150$                        |
| RC:: $k_{\text{on}}(E)$ [ $\text{s}^{-1}$ ]                                                     | —                                   | $10^5 \dots 10^9$         | $2 \cdot 10^2 \dots 2 \cdot 10^9$ | $\geq 10^4$                       |
| RC:: $k_{\text{on}}(\text{H}^+)$ [ $\text{nm}^3 \text{s}^{-1}$ ]                                | —                                   | $10^6 \dots 10^{10}$      | $2 \cdot 10^6 \dots 10^{10}$      | $(1.2 \dots 3.6) \cdot 10^8$      |
| RC:: $k_{\text{on}}(\text{Q})$ [ $\text{nm}^2 \text{s}^{-1}$ ]                                  | $5 \cdot 10^3 \dots 3 \cdot 10^5$   | —                         | $50 \dots 2 \cdot 10^6$           | $\geq 5 \cdot 10^3$               |
| RC:: $k_{\text{off}}(\text{QH2})$ [ $\text{s}^{-1}$ ]                                           | 10 ... 200                          | —                         | $0.1 \dots 10^4$                  | $\geq 12$                         |
| RC:: $k_{\text{on}}(\text{c2red})$ [ $\text{nm}^3 \text{s}^{-1}$ ]                              | —                                   | $4 \cdot 10^4 \dots 10^8$ | $10^3 \dots 5 \cdot 10^7$         | $\geq 2 \cdot 10^5$               |
| RC:: $k_{\text{off}}(\text{c2ox})$ [ $\text{s}^{-1}$ ]                                          | $150 \dots 8 \cdot 10^3$            | —                         | $2 \dots 1.5 \cdot 10^5$          | $\geq 180$                        |
| <i>bc1</i> :: $k_{\text{on}}(\text{QH2}@\text{Q}_o)$ [ $\text{nm}^2 \text{s}^{-1}$ ]            | —                                   | $10^2 \dots 10^5$         | $30 \dots 3 \cdot 10^6$           | $\geq 1.6 \cdot 10^3$             |
| <i>bc1</i> :: $k_{\text{off}}(\text{Q}@\text{Q}_o)$ [ $\text{s}^{-1}$ ]                         | 15 ... 150                          | —                         | 1 ... 250                         | $\geq 15$                         |
| <i>bc1</i> :: $k_{\text{tr}}(\text{Q}:\text{Q}_o \Rightarrow \text{Q}_i)$ [ $\text{s}^{-1}$ ]   | $10^3 \dots 2.5 \cdot 10^4$         | —                         | $0.5 \dots 5 \cdot 10^4$          | *                                 |
| <i>bc1</i> :: $k_{\text{on}}(\text{Q}@\text{Q}_i)$ [ $\text{nm}^2 \text{s}^{-1}$ ]              | —                                   | $3 \cdot 10^4 \dots 10^7$ | $10 \dots 10^5$                   | *                                 |
| <i>bc1</i> :: $k_{\text{off}}(\text{QH2}@\text{Q}_i)$ [ $\text{s}^{-1}$ ]                       | 20 ... 200                          | —                         | $0.3 \dots 10^3$                  | $\geq 30$                         |
| <i>bc1</i> :: $k_{\text{tr}}(\text{QH2}:\text{Q}_i \Rightarrow \text{Q}_o)$ [ $\text{s}^{-1}$ ] | $8 \cdot 10^2 \dots 2.5 \cdot 10^4$ | —                         | $0.5 \dots 5 \cdot 10^4$          | *                                 |
| <i>bc1</i> :: $k_{\text{on}}(\text{c2ox})$ [ $\text{nm}^3 \text{s}^{-1}$ ]                      | $5 \cdot 10^5 \dots 10^8$           | —                         | $5 \cdot 10^3 \dots 10^8$         | $\geq 2 \cdot 10^5$               |
| <i>bc1</i> :: $k_{\text{off}}(\text{c2red})$ [ $\text{s}^{-1}$ ]                                | —                                   | $10^2 \dots 10^5$         | $0.5 \dots 5 \cdot 10^5$          | $\geq 22$                         |
| <i>bc1</i> :: $k_{\text{off}}(\text{H}^+@\text{Q}_o)$ [ $\text{s}^{-1}$ ]                       | —                                   | $10^3 \dots 5 \cdot 10^5$ | $10 \dots 5 \cdot 10^4$           | $\geq 110$                        |
| <i>bc1</i> :: $k_{\text{tr}}(\text{e}:\text{Q}_o \Rightarrow \text{FeS})$ [ $\text{s}^{-1}$ ]   | —                                   | —                         | $1 \dots 10^4$                    | $\geq 46$                         |
| <i>bc1</i> :: $k_{\text{tr}}(\text{FeS}:\text{b} \Rightarrow \text{c})$ [ $\text{s}^{-1}$ ]     | $10^2 \dots 3 \cdot 10^4$           | —                         | $5 \dots 6 \cdot 10^5$            | $\geq 60$                         |
| <i>bc1</i> :: $k_{\text{tr}}(\text{FeS}:\text{c} \Rightarrow \text{b})$ [ $\text{s}^{-1}$ ]     | $10^2 \dots 3 \cdot 10^4$           | —                         | $1 \dots 3 \cdot 10^5$            | $\geq 35$                         |
| <i>bc1</i> :: $k_{\text{tr}}(\text{e}:\text{b}_H \Rightarrow \text{Q}_i)$ [ $\text{s}^{-1}$ ]   | $3 \cdot 10^2 \dots 5 \cdot 10^4$   | —                         | $1 \dots 10^5$                    | $> 12$                            |
| <i>bc1</i> :: $\Phi_0$                                                                          | 60 ... 250                          | 60 ... 250                | $1 \dots 5 \cdot 10^4$            | 46 ... 3000                       |
| $\Delta\Phi::\Delta U_0$                                                                        | 3 ... 30                            | 3 ... 30                  | $10^{-2} \dots 10^3$              | 1.4 ... 40                        |
| $\Delta\Phi::\Delta\Phi_0$                                                                      | —                                   | 2 ... 75                  | $10^{-2} \dots 10^3$              | *                                 |
| #Gen/#Ind.                                                                                      | 40/800                              | 40/800                    | 34/1600                           |                                   |

**Table S3: Search Ranges for the Parameter Optimization**

This table gives the parameter ranges that were used for the random initialization of new parameter sets during the two main parameterization runs A1 and A2 and in the largest of the subsequent test runs (B6). In B6 25 parameters were optimized simultaneously compared to the 17 and 12 parameters in A1 and A2, respectively, with ranges that were wider by orders of magnitudes. From the results, which had much weaker statistics, we could not obtain converged parameter values, but from the distributions of the masterscore vs. the respective parameter values we estimated in which ranges the parameters should be (also see figure S5). These estimates are given in the last column. Here, an

asterisk denotes that no clear range estimate could be read from a rather flat score distribution. These estimates confirm that that the initially chosen ranges indeed included the optimal parameter values. The last line lists the numbers of generations and individuals per generation for each of the runs. Runs A1 and A2 were performed with  $\delta_{\text{local}} = 0.2$  and  $\delta_{\text{global}} = 0.1$ , while for the wide range run B6 a rather large value of 0.5 was used for both criteria, which broadened the resulting parameter distributions.
