# Supplementary material for: Bridging the Gap: Linking Molecular Simulations and Systemic Descriptions of Cellular Compartments
Source: PubMed Central journal article supplement (PMC2989909; doi:10.1371/journal.pone.0014070), 2010-11-22
Supplement: pone.0014070.s009.pdf [file pone.0014070.s009.pdf]

## Fit Functions to the Experimental Time Traces

Before comparing the simulation results to the respective fit functions, the simulation results were scaled for best fit. Also the time axis was shifted such that the onset of the illumination profile starts at  $t = 0$ . The fit functions are therefore given in arbitrary units. The fit functions are shown in figure 5 of the main text together with the experimental data and the three best simulation results.

The fit to the oxidation state of the cytochrome  $c$  in **A6\_cytc** was defined piecewise as

$$f(t_i < t \leq t_{i+1}) = c_i + d_i (1 - \exp[-k_i(t - t_i)]) + e_i(t - t_i)$$

with the coefficients given in the following table. The simulation results were multiplied by  $(-1)$  and scaled such that the first step had the same height as the fit function.

| $i$ | $t_i$ [ms] | $c_i$ | $d_i$ | $k_i$ [ms <sup>-1</sup> ] | $e_i$ |
|-----|------------|-------|-------|---------------------------|-------|
| 1   | 30         | 6.3   | 0     | 0.0                       | 0.0   |
| 2   | 60         | 10.7  | 0     | 0.0                       | 0.0   |
| 3   | 90         | 10.7  | 1.4   | 0.3                       | 0.0   |
| 4   | 120        | 12.2  | 0.8   | 0.2                       | 0.0   |
| 5   | 150        | 13.0  | 0.4   | 0.2                       | 0.0   |
| 6   | 180        | 13.4  | 2.0   | 0.009                     | 0.0   |
| 7   | 770        | 18.64 | 0.0   | 0.0                       | 2.0   |
| 8   | 1000       | —     | —     | —                         | —     |

For **A7\_cytc** the simulation result was scaled to have a maximum of the same height and was fitted against a sum of two exponentials

$$f(t) = c_0 + \sum_{i=1}^2 c_i \exp[-k_i(t - t_i)]$$

with the following parameters:

| $i$ | $t_i$ [ms] | $c_i$ | $k_i$ [ms <sup>-1</sup> ] |
|-----|------------|-------|---------------------------|
| 0   | —          | 0.04  | —                         |
| 1   | 0.0        | -0.17 | 0.13                      |
| 2   | 0.1        | 2.5   | 0.28                      |

A similar fit with three exponentials was used for **A7\_ΔΦ**, too, but with  $t_i = 0$  this time.

| $i$ | $c_i$ | $k_i$ [ms <sup>-1</sup> ] |
|-----|-------|---------------------------|
| 0   | 0.61  | —                         |
| 1   | -0.9  | 100                       |
| 2   | -1.03 | 0.48                      |
| 3   | 1.33  | 0.012                     |

For **A8\_ΔΦ** the same fit function was used as for **A6\_cytc** with the coefficients given in the following table. The simulation results were scaled such that the first step of  $\Delta\Phi$  directly after the flash at  $t = 0$  has a value of 1.0.

| $i$ | $t_i$ [s] | $c_i$ | $d_i$ | $k_i$ [s <sup>-1</sup> ] | $e_i$ |
|-----|-----------|-------|-------|--------------------------|-------|
| 1   | 0.0       | 1     | 1.3   | 0.8                      | 0.0   |
| 2   | 4.5       | 1     | 1.3   | 480                      | -0.07 |
| 3   | 8.95      | 0.48  | 1.5   | 8.0                      | 0.0   |
| 4   | 11        | —     | —     | —                        | —     |

The fit to **A9\_cytc** was described by the same function as **A8\_ΔΦ**. Here, the simulation was scaled to the same average value as the fit during the interval  $2 \text{ s} < t < 8 \text{ s}$ . The coefficients of the fit function are given in the table below.

| $i$ | $t_i$ [s] | $c_i$  | $d_i$ | $k_i$ [s <sup>-1</sup> ] | $e_i$ |
|-----|-----------|--------|-------|--------------------------|-------|
| 1   | 0         | 0      | -1.60 | 0.7                      | 0.0   |
| 2   | 1.59      | -1.078 | -1.55 | 2.3                      | 0.0   |
| 3   | 3.5       | -1.231 | 0.0   | —                        | 0.04  |
| 4   | 9.05      | -0.33  | 0.28  | 2.3                      | 0.0   |
| 5   | 11        | —      | —     | —                        | —     |

To ignore the flash-related spikes seen in the semiquinone oscillations of **B1\_Q**, the simulation results were fitted against constant values  $d_i$  during the intervals  $t_i + 0.4 \text{ s} < t < t_i + 0.95 \text{ s}$ .

|           |   |      |      |      |      |
|-----------|---|------|------|------|------|
| $t_i$ [s] | 0 | 1    | 2    | 3    | 4    |
| $d_i$     | 0 | 1.38 | 0.41 | 2.15 | 0.55 |

The complex multi-spike measurements of **B6\_P** were described by a sum of two fit functions  $f_1(t) + f_2(t)$ , whereby  $f_1$  models the amplitude of the train of spikes and  $f_2$  describes the individual spikes. The simulation results were normalized against the height of the first spike.

$$f_1(t) = 0.8 + 0.1 \exp[-25 \text{ ms}^{-1} t] + \exp[0.1 \text{ ms}^{-1} t]$$

$$f_2(t) = -c_i (1 - \exp[-k_i (t - t_i)]) - d_i (t - t_i)$$

| $i$ | $t_i$ [ms] | $c_i$ | $k_i$ [ $\text{ms}^{-1}$ ] | $d_i$ |
|-----|------------|-------|----------------------------|-------|
| 1   | 0.0        | 0.88  | 0.80                       | 0.0   |
| 2   | 20         | 0.88  | 0.65                       | 4.5   |
| 3   | 40         | 0.8   | 0.65                       | 3.0   |
| 4   | 60         | 0.77  | 0.60                       | 4.0   |
| 5   | 80         | 0.72  | 0.70                       | 7.5   |
| 6   | 100        | 0.79  | 0.50                       | 2.0   |
| 7   | 120        | 0.75  | 0.50                       | 4.0   |
| 8   | 140        | 0.75  | 0.55                       | 5.0   |
| 9   | 160        | 0.70  | 1.00                       | 7.0   |
| 10  | 180        | 0.70  | 1.00                       | 8.0   |
| 11  | 200        | 0.70  | 1.00                       | 7.0   |
| 12  | 220        | 0.72  | 0.70                       | 6.0   |
| 13  | 240        | 0.74  | 0.70                       | 3.0   |
| 14  | 260        | 0.74  | 0.80                       | 4.0   |
| 15  | 280        | 0.67  | 1.00                       | 8.0   |
| 16  | 300        | 0.75  | 0.60                       | 2.0   |
| 17  | 320        | —     | —                          | —     |

For the corresponding experiment **B6\_cytc** we multiplied the simulation results with  $(-1)$  and used

$$f_1(t) = 0.9 + 0.1 \exp[-35 \text{ ms}^{-1} t] + \exp[3 \text{ ms}^{-1} t]$$

and the same  $f_2(t)$  as for B6\_P with the following parameters:

| $i$ | $t_i$ [ms] | $c_i$ | $k_i$ [ $\text{ms}^{-1}$ ] | $d_i$ |
|-----|------------|-------|----------------------------|-------|
| 1   | 0.0        | 0.82  | 0.70                       | 3.0   |
| 2   | 20         | 0.70  | 0.60                       | 8.0   |
| 3   | 40         | 0.70  | 0.70                       | 5.0   |
| 4   | 60         | 0.65  | 0.70                       | 8.0   |
| 5   | 80         | 0.65  | 0.75                       | 8.0   |
| 6   | 100        | 0.63  | 0.70                       | 9.0   |
| 7   | 120        | 0.63  | 0.75                       | 8.0   |
| 8   | 140        | 0.63  | 0.60                       | 9.0   |
| 9   | 160        | 0.64  | 1.0                        | 7.0   |
| 10  | 180        | 0.62  | 0.85                       | 10.0  |
| 11  | 200        | 0.65  | 0.75                       | 7.0   |
| 12  | 220        | 0.64  | 0.65                       | 9.0   |
| 13  | 240        | 0.65  | 0.55                       | 8.0   |
| 14  | 260        | 0.64  | 0.70                       | 9.0   |
| 15  | 280        | 0.63  | 0.78                       | 8.0   |
| 16  | 300        | 0.70  | 0.50                       | 15.0  |
| 17  | 320        | —     | —                          | —     |

To score the steady state throughput of the  $bc_1$  complex in the scenario **BC1**, the simulation was run for 20 seconds with a single  $bc_1$  and then the number of reduced cytochrome  $c_2$ ,  $N_{c2}$ , was converted into the score as

$$s = \exp \left[ -\frac{(N_{c2} - N_{avg})^2}{2\sigma^2} \right]$$

with  $N_{avg} = 1500$  and  $\sigma = 200$ .
